# Supplementary material
Source: publisher figshare collection journal article supplement (https://tandf.figshare.com/ndownloader/files/13662149)
Supplement: Supplementary file 1 [file 13662149]

Supplemental material

Antimicrobial mechanism and the effect of atmospheric pressure N2 plasma jet on the regeneration capacity of *Staphylococcus aureus* biofilm

Jiaquan Wang,Zhiyuan Yu, Zimu Xu, Shuheng Hu, Yunxia Li, Xiaojuan Xue, Qiuchen Cai, Xiaoxia Zhou, Jie Shen, Yan Lan, Cheng Cheng


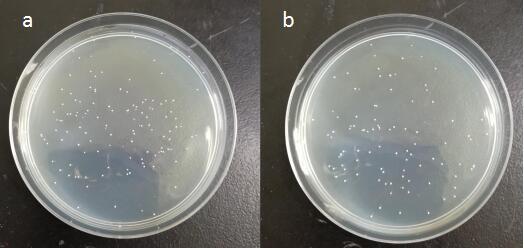


Fig.S1 Colony size for the initial and treated cultures

Table S1 Diameters of the *S. aureus* colonies used in this study.

| Sample No.(n=30) | Diameter (mm) | Diameter (mm) |
| --- | --- | --- |
| 1 | 0.82 | 0.77 |
| 2 | 0.70 | 0.75 |
| 3 | 0.81 | 0.83 |
| 4 | 0.70 | 0.80 |
| 5 | 0.76 | 0.74 |
| 6 | 0.84 | 0.82 |
| 7 | 0.63 | 0.71 |
| 8 | 0.74 | 0.83 |
| 9 | 0.79 | 0.78 |
| 10 | 0.69 | 0.71 |
| 11 | 0.79 | 0.79 |
| 12 | 0.88 | 0.82 |
| 13 | 0.82 | 0.84 |
| 14 | 0.80 | 0.85 |
| 15 | 0.71 | 0.69 |
| 16 | 0.69 | 0.77 |
| 17 | 0.69 | 0.71 |
| 18 | 0.77 | 0.80 |
| 19 | 0.76 | 0.68 |
| 20 | 0.81 | 0.74 |
| 21 | 0.67 | 0.70 |
| 22 | 0.80 | 0.78 |
| 23 | 0.75 | 0.83 |
| 24 | 0.72 | 0.85 |
| 25 | 0.66 | 0.70 |
| 26 | 0.77 | 0.75 |
| 27 | 0.68 | 0.67 |
| 28 | 0.74 | 0.69 |
| 29 | 0.81 | 0.80 |
| 30 | 0.83 | 0.81 |
| Average | 0.754 | 0.767 |
| Standard deviation | 0.062 | 0.056 |

Table S2 The OD600 values for the *S. aureus* colonies from the initial and treated cultures at different growth time. a）for the initial culture; b) for the treated culture.

| OD600(nm)±SD | | |
| --- | --- | --- |
| Number  Growth time(h) | a | b |
| 2 | 0.218±0.056 | 0.33±0.088 |
| 4 | 1.71±0.14 | 1.31±0.091 |
| 6 | 2.48±0.33 | 3.30±0.22 |
| 8 | 3.17±0.19 | 3.45±0.31 |
| 10 | 3.5±0.08 | 3.96±0.184 |
| 12 | 4.08±0.27 | 4.42±0.285 |
| 14 | 4.32±0.31 | 4.722±0.11 |
| 16 | 4.45±0.338 | 4.76±0.338 |
| 18 | 4.61±0.286 | 4.80±0.42 |
| 20 | 4.94±0.219 | 5.00±0.334 |
| 22 | 5.21±0.185 | 5.21±0.295 |
| 24 | 5.43±0.094 | 5.386±0.276 |


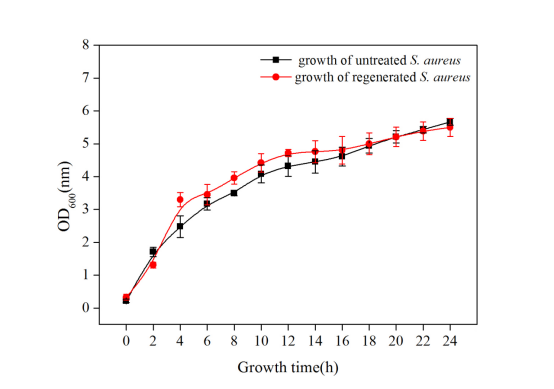


Fig.S2 Growing curves (OD600 nm) for the *S. aureus* colonies from the initial and treated cultures at different growth time. Each point represents the mean of 9 values ±SD (standard deviation).


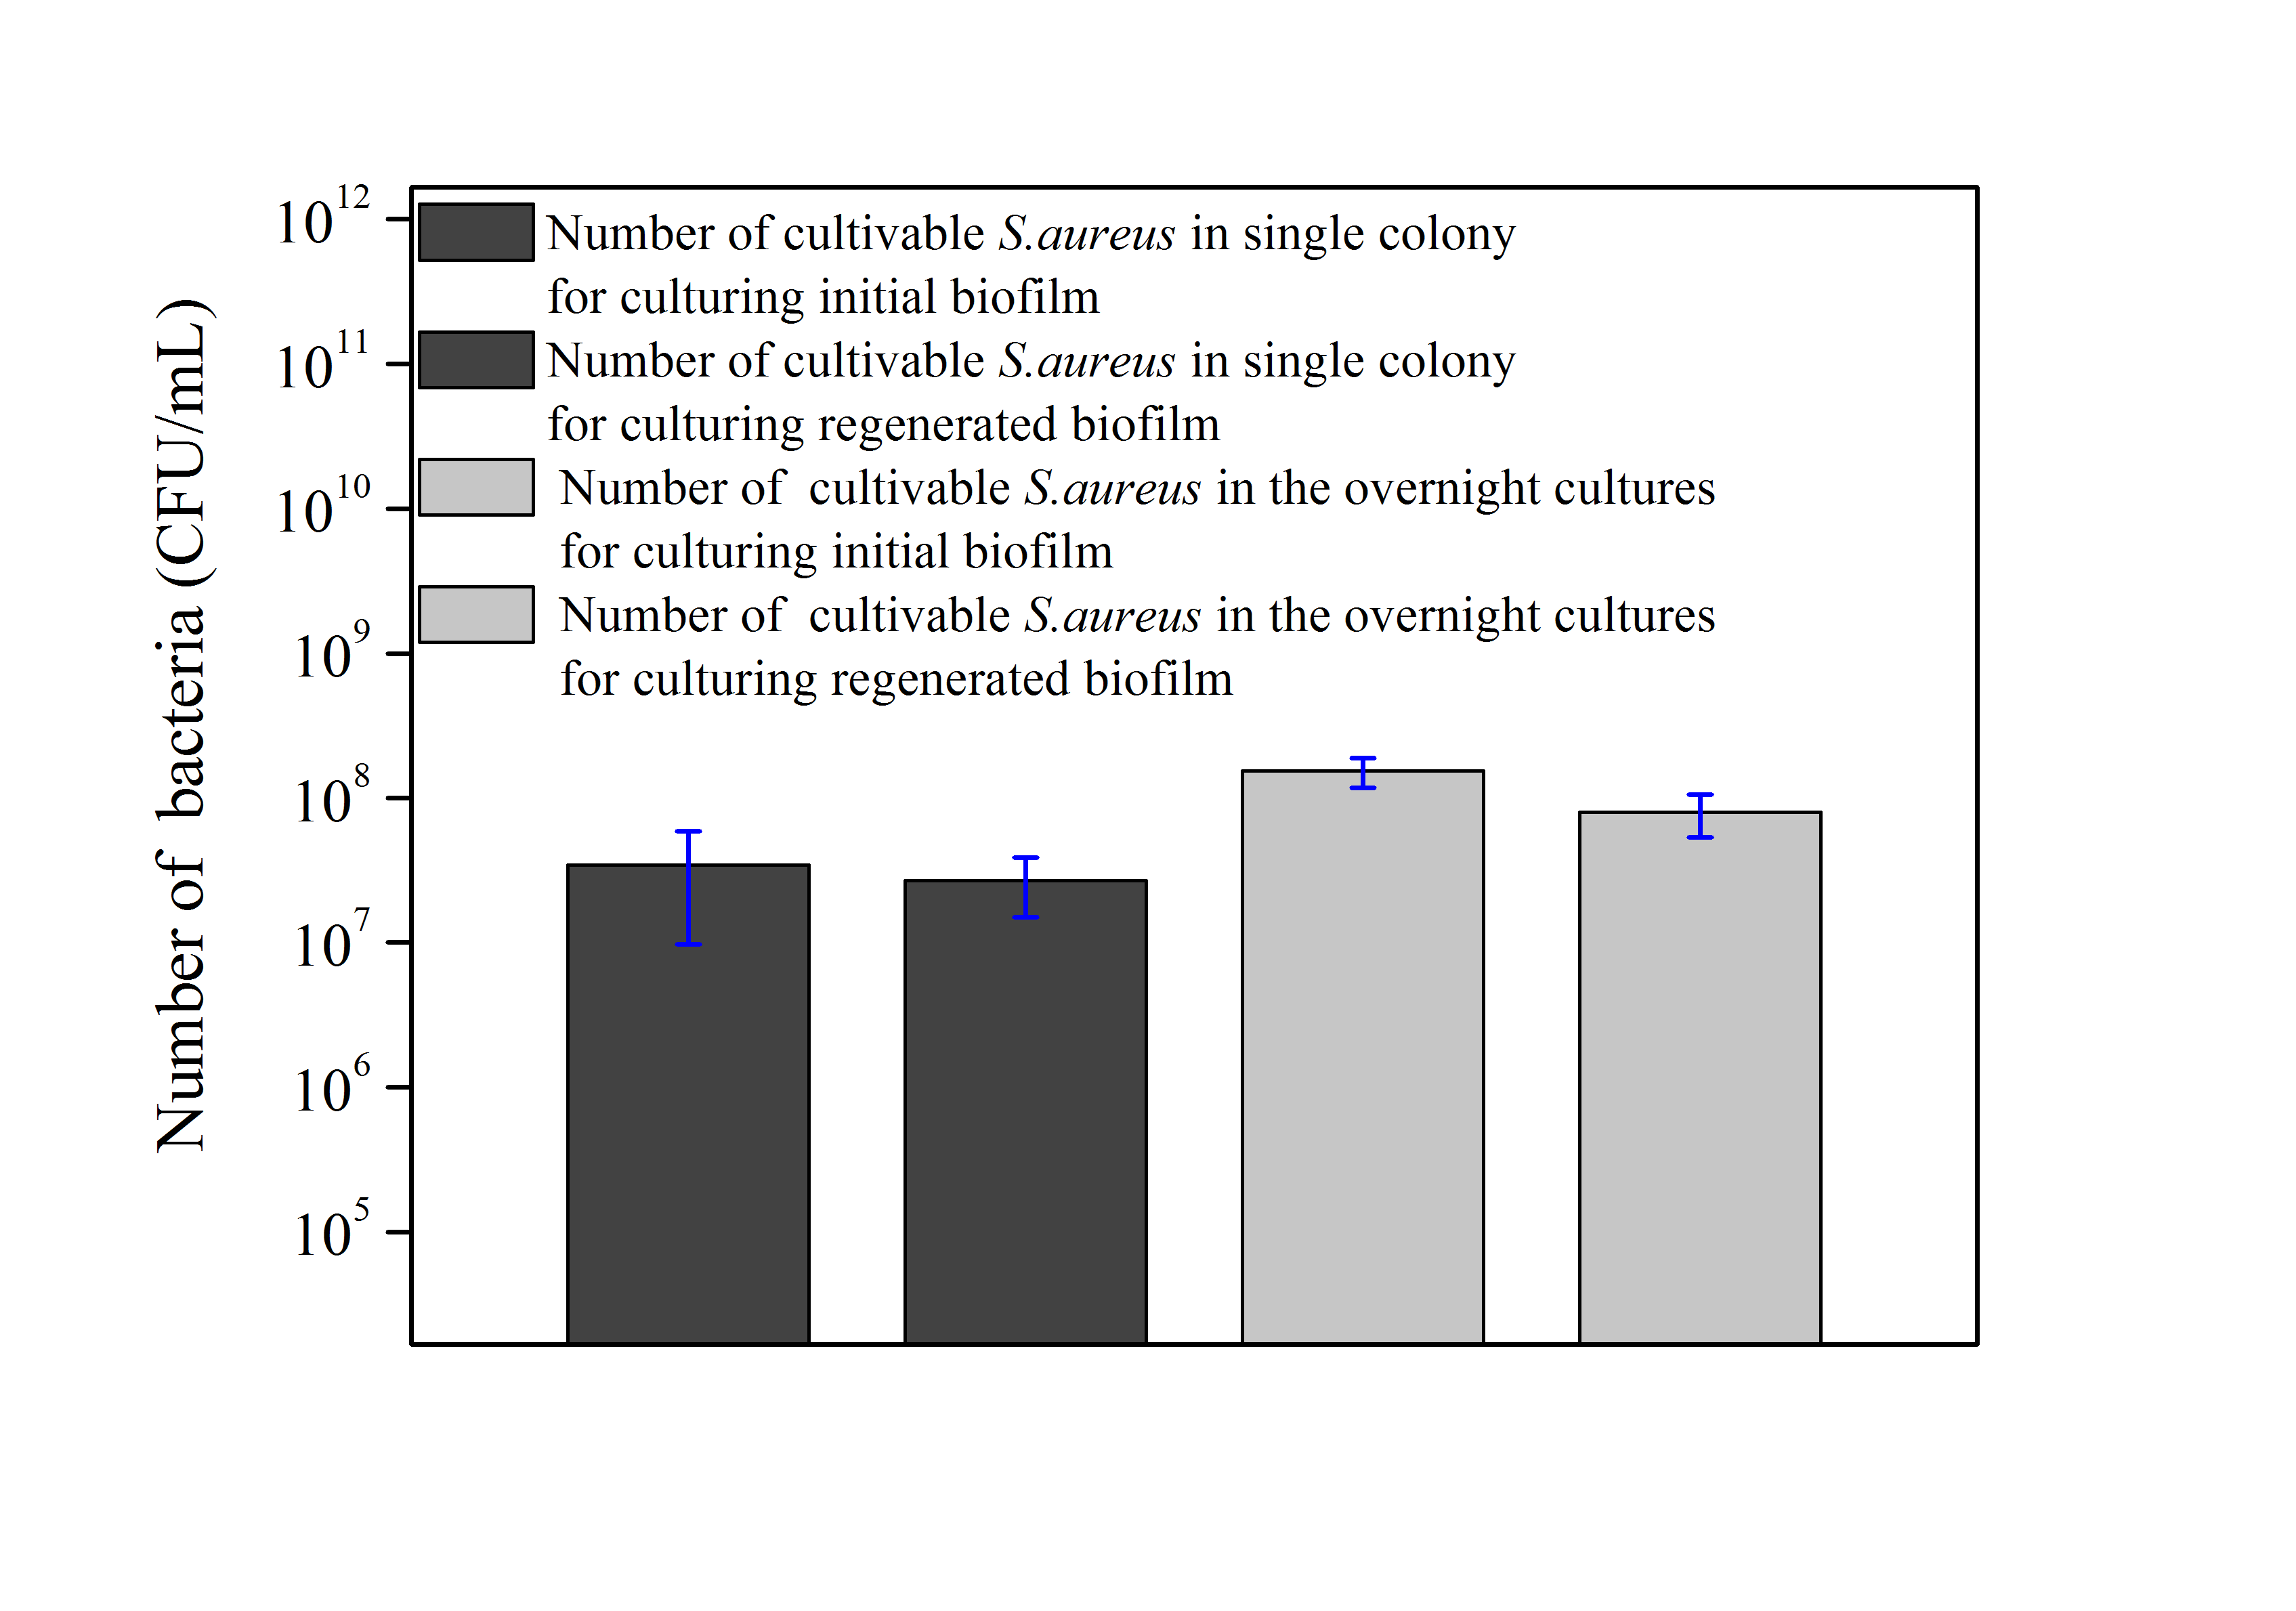


Fig.S3 Number of cultivable bacteria in a single colony and their overnight cultures used for culturing the initial/regenerated biofilms. Each volume datum represents the mean of 9 values ±SD (standard deviation).


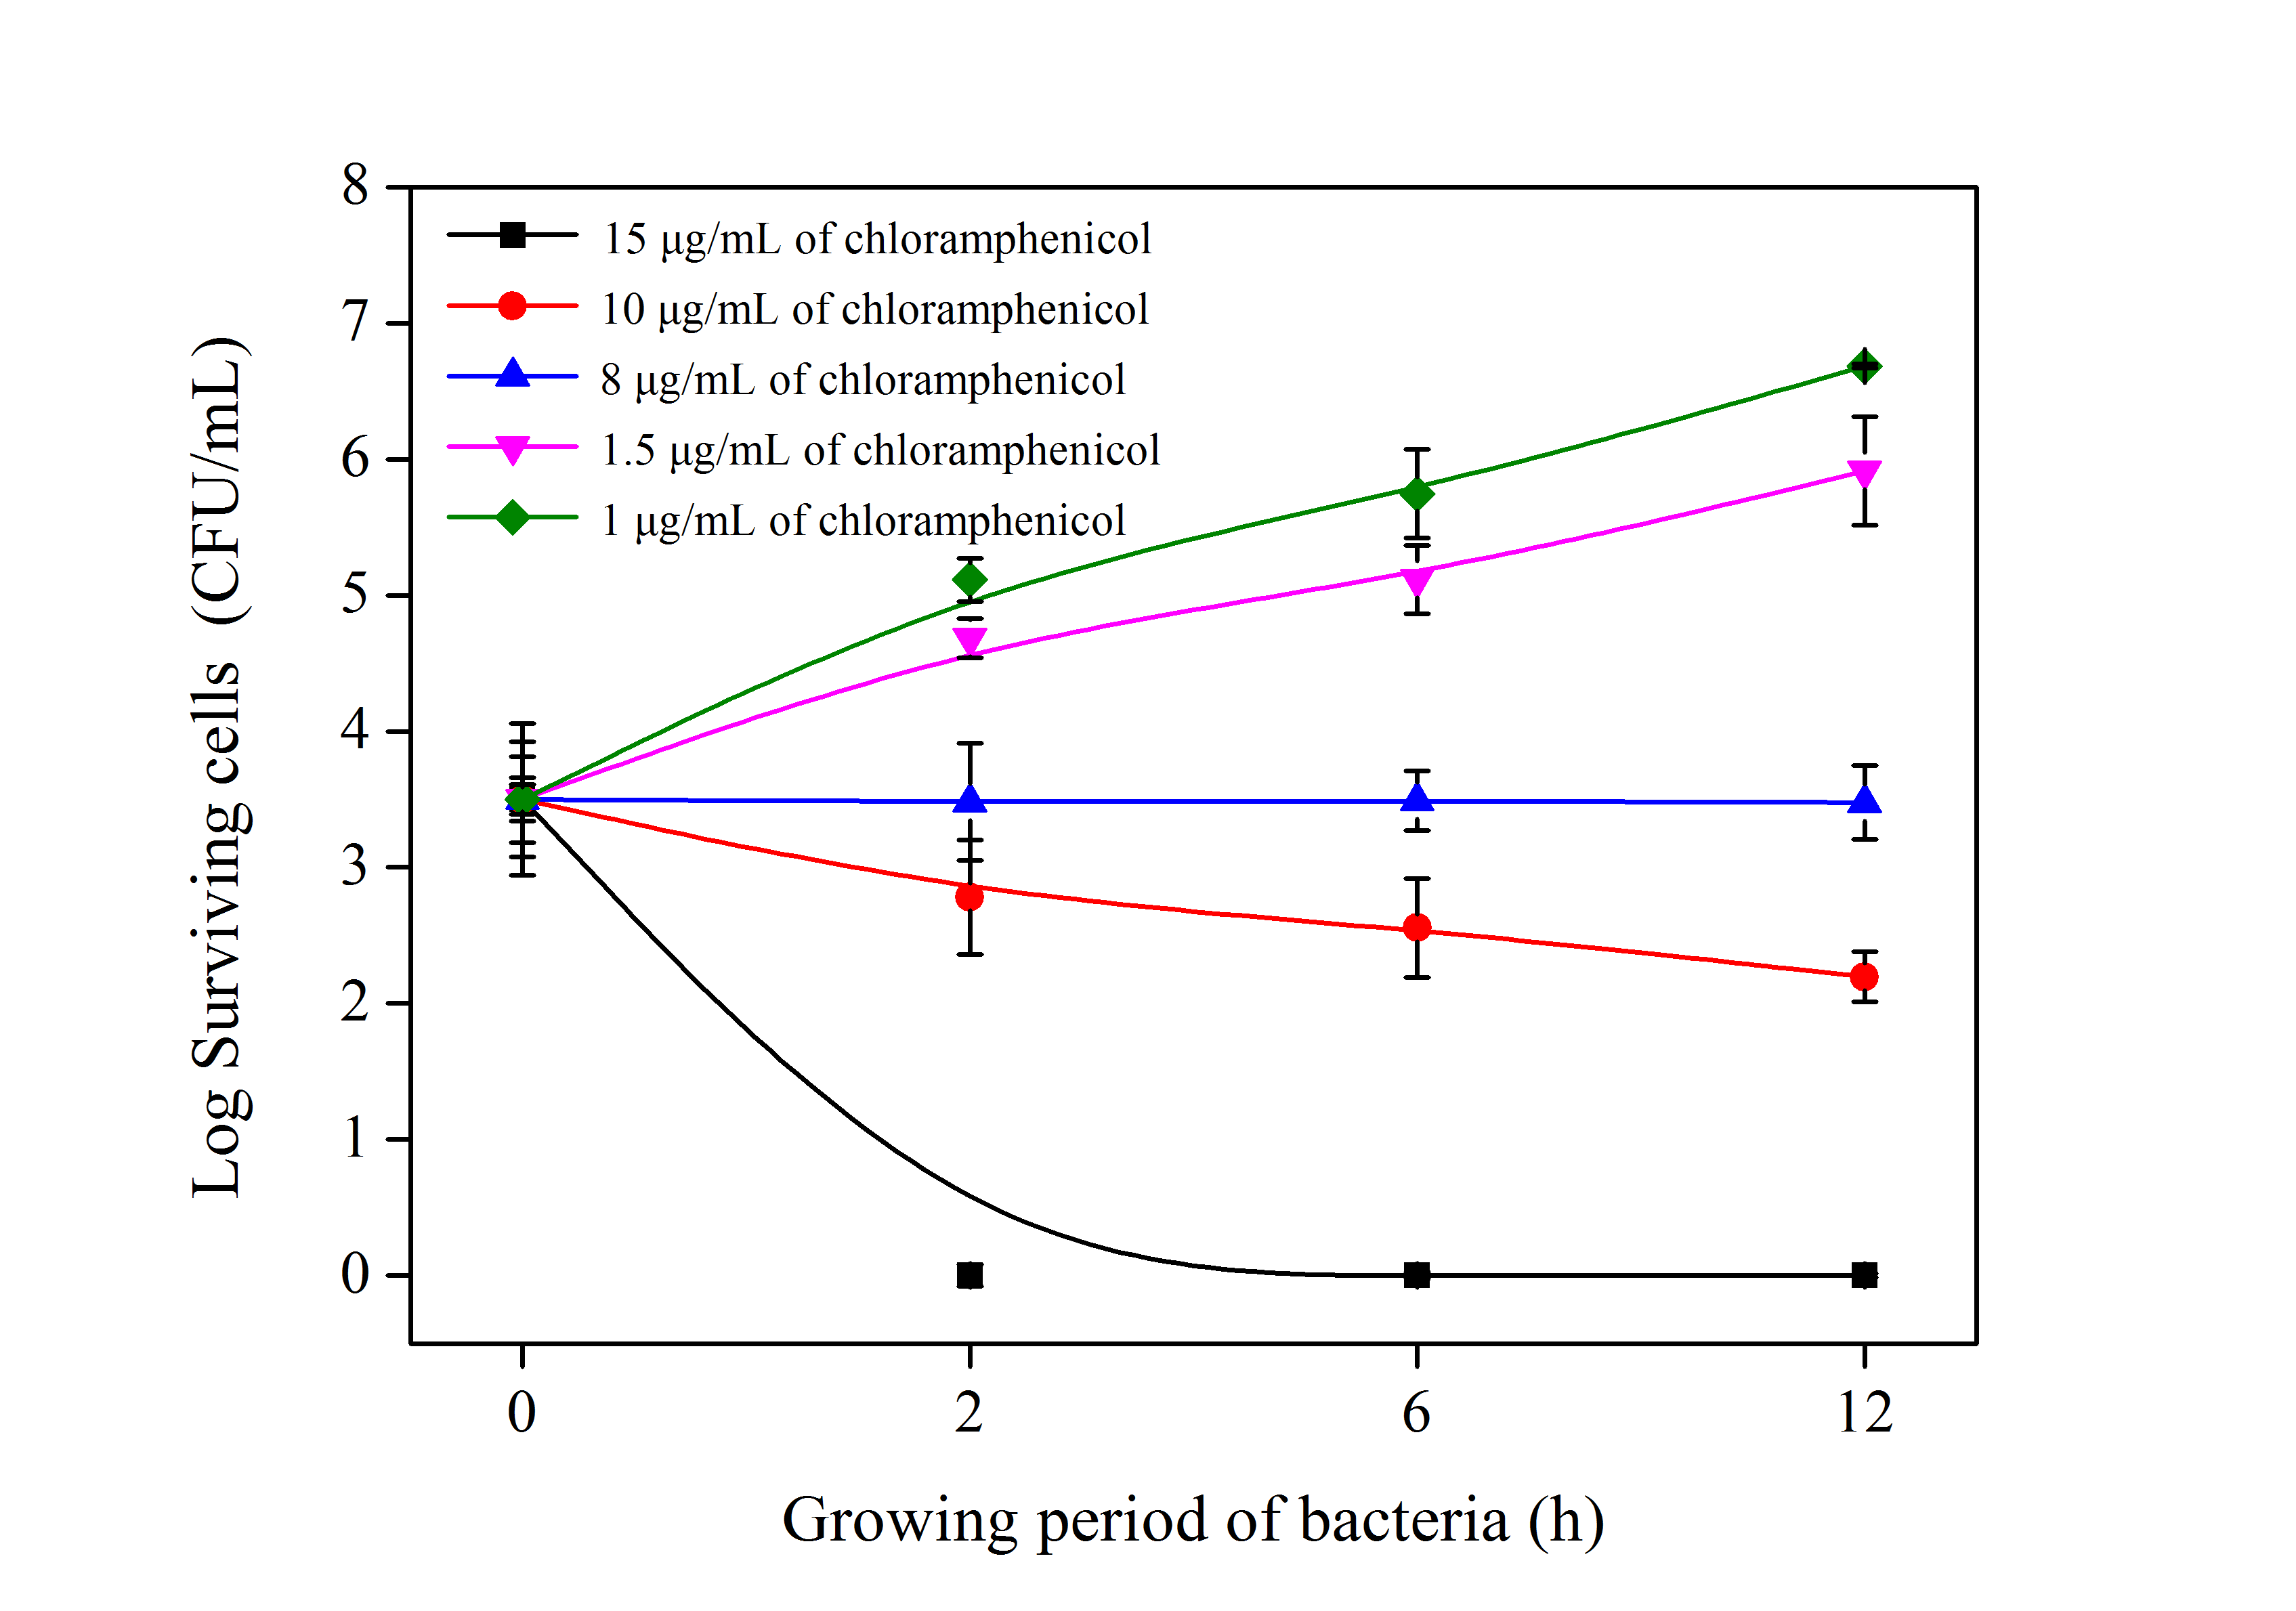


Fig.S4 Bacteriostatic effect on 3.5 log CFU/mL of *S.aureus* by chloramphenicol. Each point represents the mean of 9 values ±SD (standard deviation).


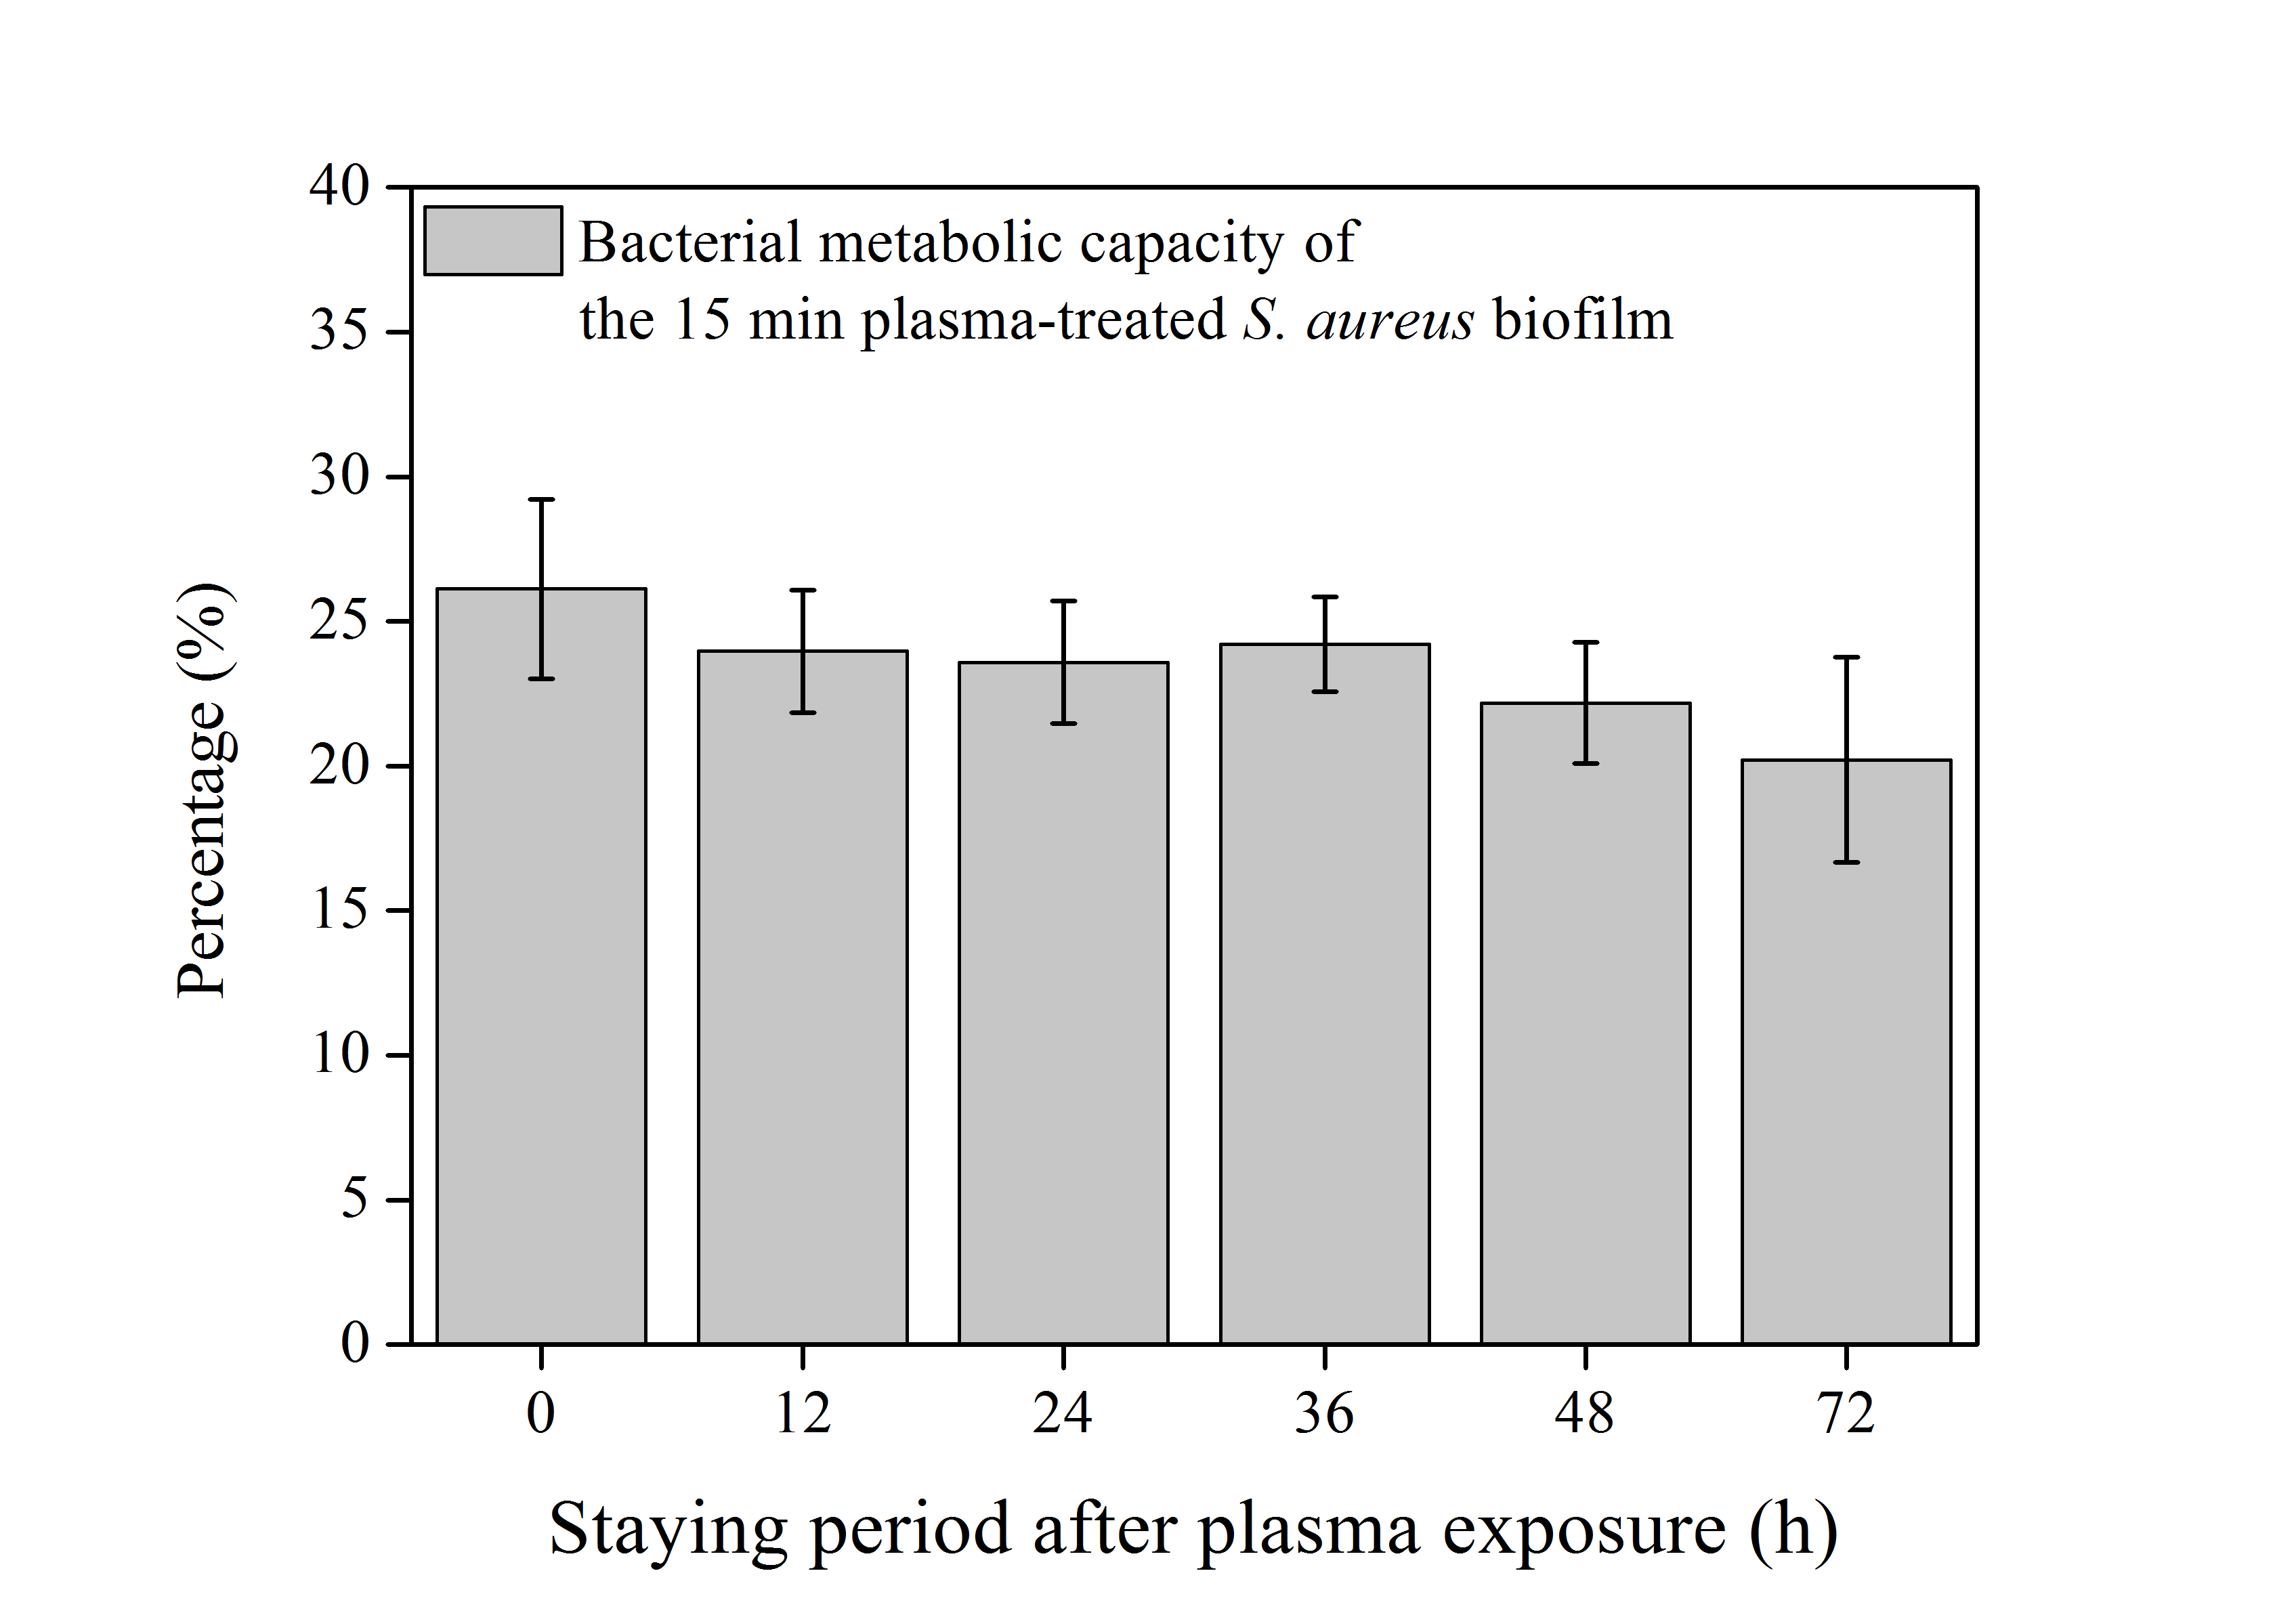


Fig.S5 Measurements on the number of metabolic active *S. aureus* after 15 min of plasma treatment for different staying periods. Each volume datum represents the mean of 9 values ±SD (standard deviation).


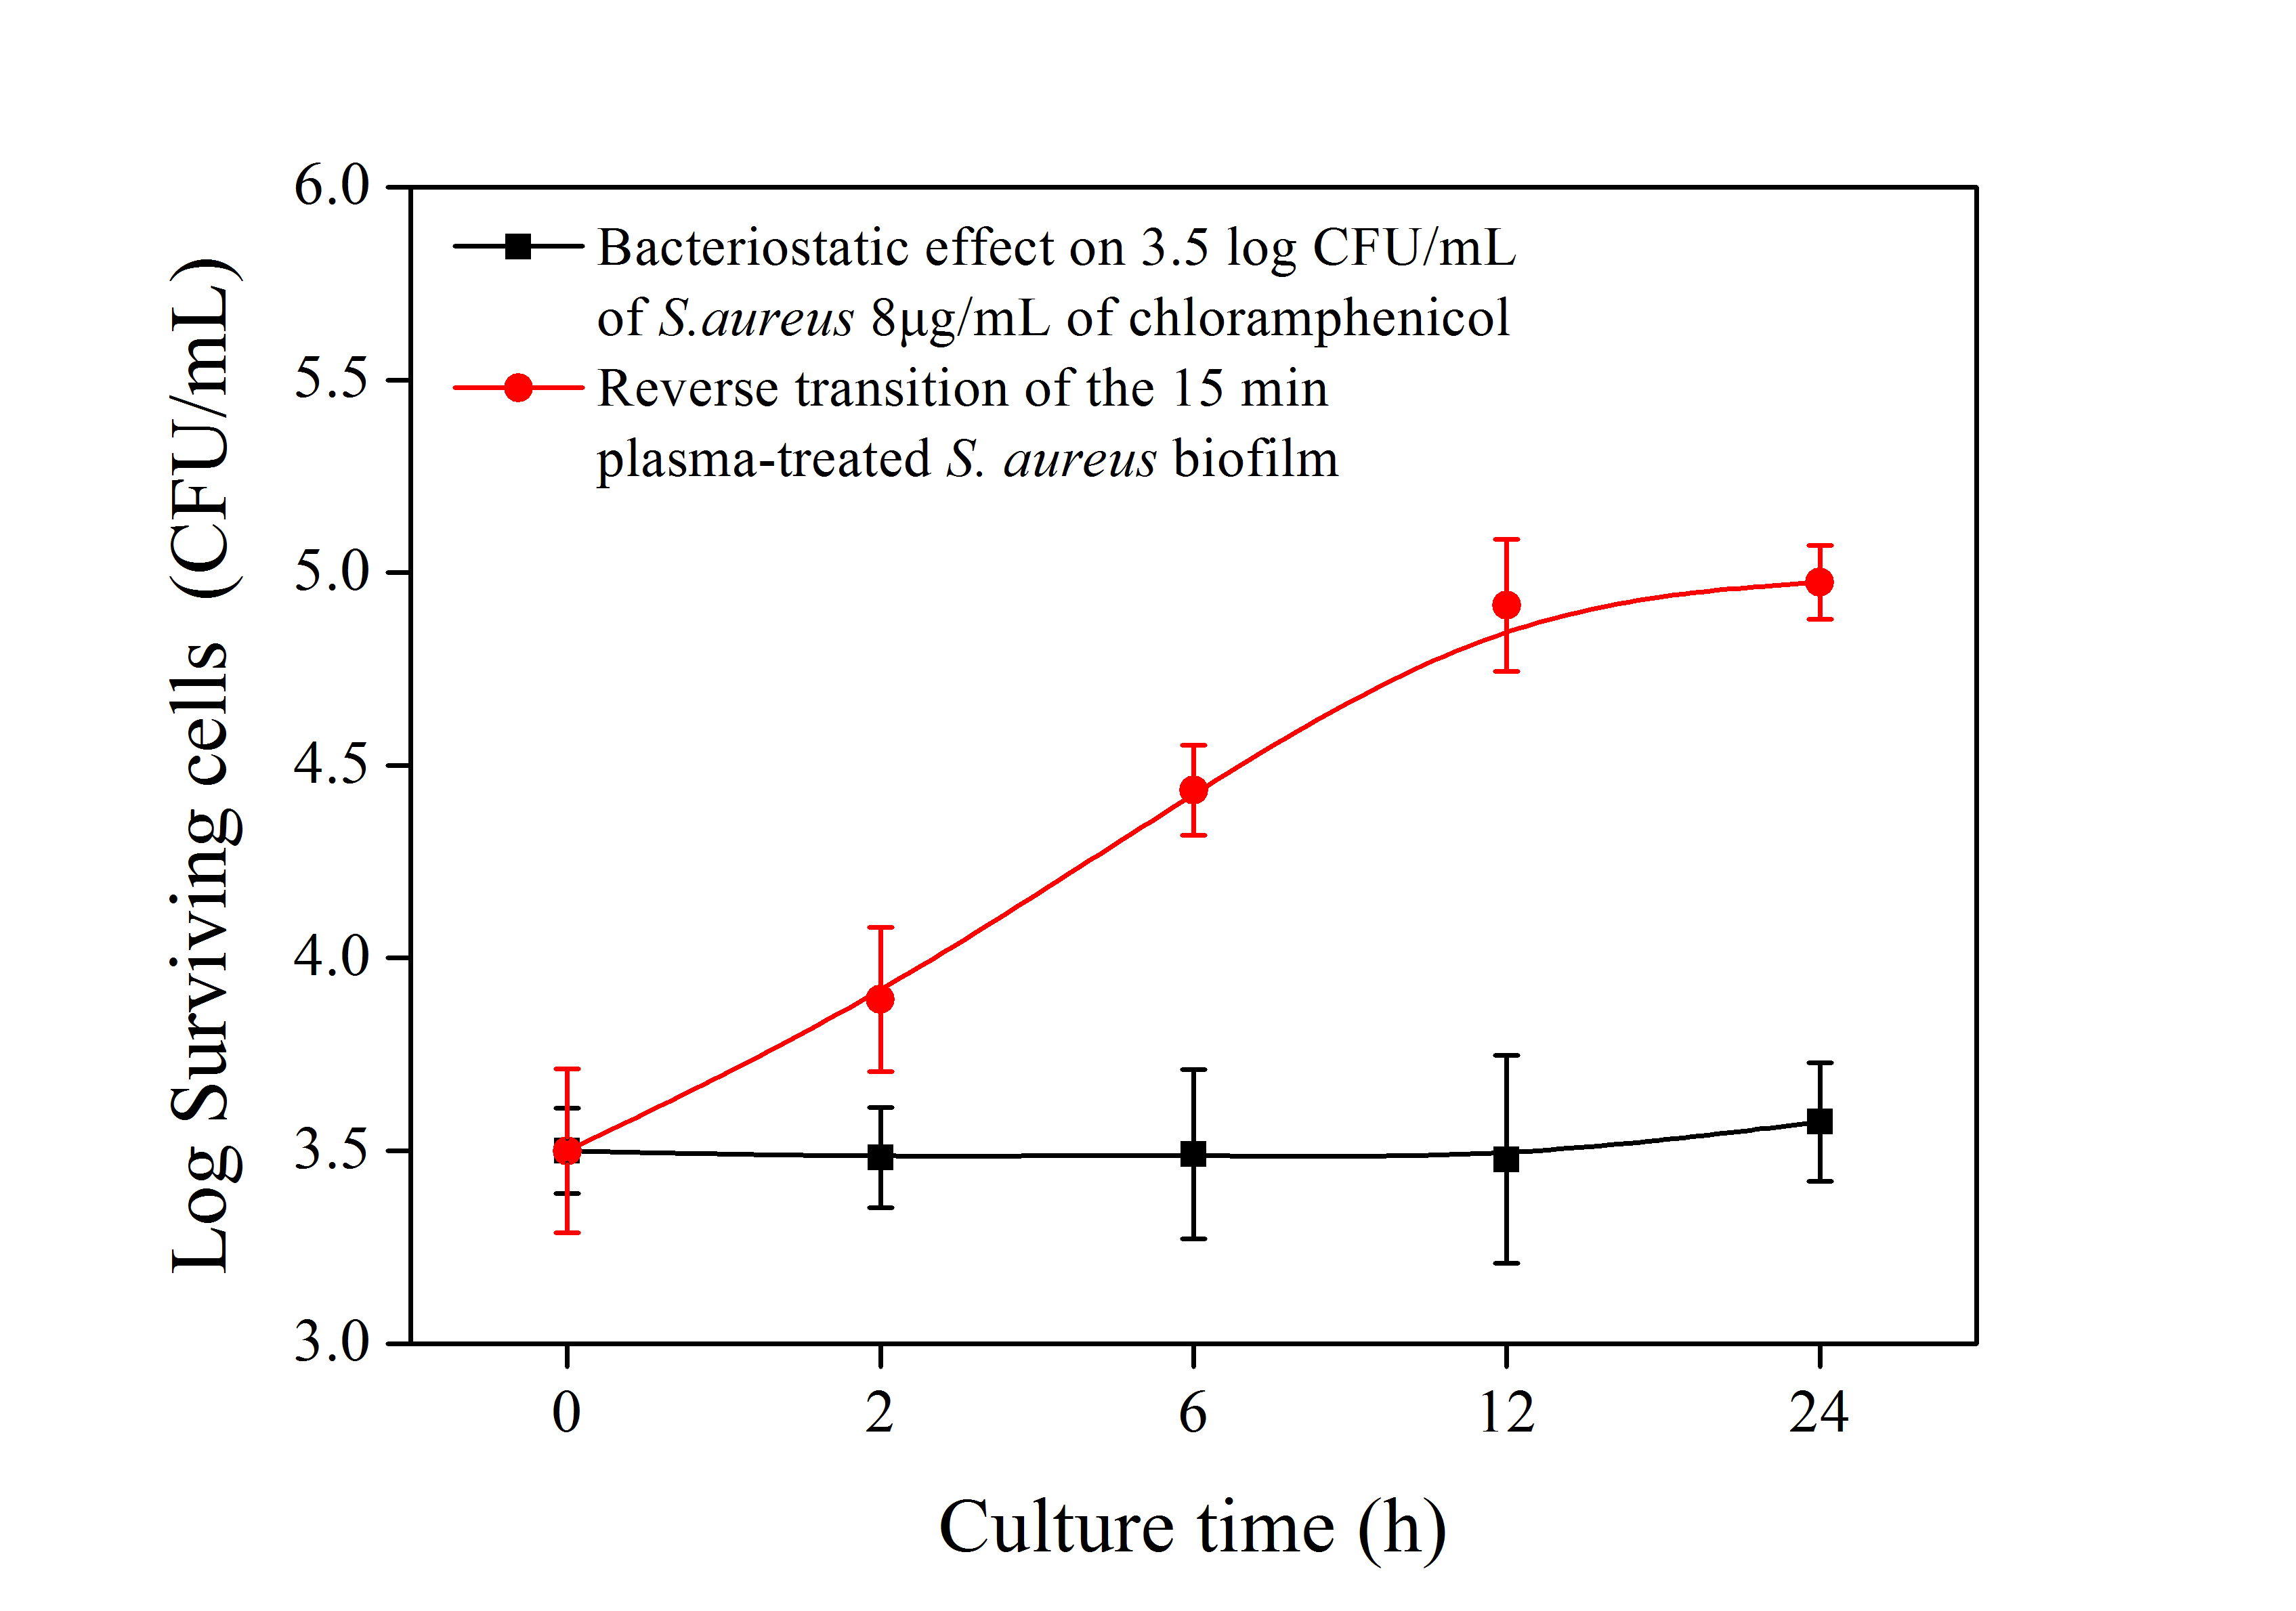


Fig.S6 Reverse transition of the 15 min plasma-treated *S. aureus* and the bateriostatic effect on 3.5 log CFU/mL of *S.aureus* by 8 µg/mL of chloramphenicol. Each point represents the mean of 9 values ±SD (standard deviation).


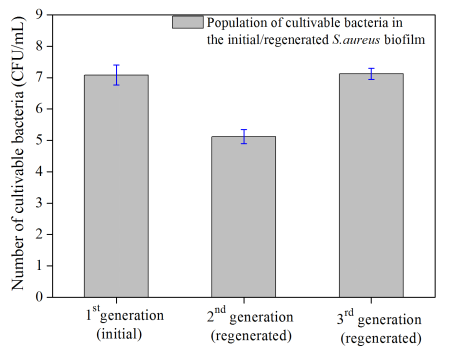


Fig.S7 Number of cultivable bacteria in the initial/regenerated *S. aureus* biofilms. Each volume datum represents the mean of 9 values ±SD (standard deviation).


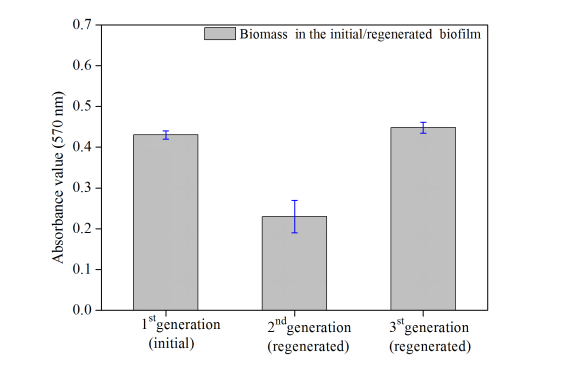


Fig.S8 Variations on biomass of the initial/regenerated *S. aureus* biofilms. Each volume datum represents the mean of 9 values ±SD (standard deviation).

Table S3 Variations on biomass of the N2 5-min APPJ-treated in the (1st, 2nd, 3rd) *S. aureus* biofilms.

| Growth generation | CFU±SD | Absorbance value(570 nm)±SD |
| --- | --- | --- |
| 1st  Generation(Initial) | 7.08±0.318 | 0.43±0.01 |
| 2nd Generation(Regenerated) | 5.12±0.227 | 0.23±0.04 |
| 3rd Generation(Regenerated) | 7.123±0.178 | 0.23±0.04 |
